# Supplementary material for: Circular RNA screening identifies circMYLK4 as a regulator of fast/slow myofibers in porcine skeletal muscles
Source: Mol Genet Genomics. 2021 Nov 16;297(1):87–99. doi: 10.1007/s00438-021-01835-5 (PMC8803689; doi:10.1007/s00438-021-01835-5)
Supplement: Supplementary file 1 — Supplementary file1 Supplementary File: Differentially expressed circRNA between LD and Sol. (XLSX 28 KB) [file 438_2021_1835_MOESM1_ESM.xlsx]

## Sheet: Additional File
cicName	gene symbol	L5-C	S6-C	log2FoldChange	p-value	q-value	L5-C_junction	S6-C_junction
susScr3_circ:chr1:306183314-306197451	SETX	265.71	0	#NAME?	1.75991e-14	2.04939e-11	287	0
susScr3_circ:chr7:65184011-65189215	ARIH1	0	58.3267	Inf	2.68821e-06	0.00104346	0	54
susScr3_circ:chr6:869929-870276	*	1977.55	0	#NAME?	1.84632e-20	1.07501e-16	2136	0
susScr3_circ:chrX:47899533-47900084	GRIPAP1	572.157	0	#NAME?	1.18769e-18	4.47484e-15	618	0
susScr3_circ:chr13:212947616-212949113	BRWD1	159.241	18.3621	-3.11641	3.8294e-05	0.0109912	130	0
susScr3_circ:chr18:9603361-9608802	BRAF	0	133.935	Inf	7.47071e-11	5.85546e-08	0	124
susScr3_circ:chr6:870440-870717	LOC102158401	0	3997.54	Inf	9.12079e-19	4.1304e-15	0	3701
susScr3_circ:chr6:869929-870291	*	450.874	0	#NAME?	1.71372e-17	3.88034e-14	487	0
susScr3_circ:chr8:144763071-144767647	SEC31A	0	36.7242	Inf	0.000190525	0.0431401	0	34
susScr3_circ:chr11:5189667-5210814	PAN3	81.4722	0	#NAME?	1.57268e-07	7.8168e-05	88	0
susScr3_circ:chr8:4258670-4260865	ABLIM2	7975.01	0	#NAME?	1.22583e-14	1.57232e-11	8614	0
susScr3_circ:chr6:869931-870254	*	9304.49	0	#NAME?	1.11397e-13	1.19479e-10	10050	0
susScr3_circ:chr13:33927099-33928713	LOC100519172	43.5135	0	#NAME?	8.52716e-05	0.0214532	47	0
susScr3_circ:chr16:70114535-70114755	RNF145	15.7389	155.538	3.30485	1.53567e-05	0.00492828	0	2
susScr3_circ:chr6:89828173-89832876	LDLRAD4	69.4365	0	#NAME?	9.55732e-07	0.000405758	75	0
susScr3_circ:chr10:8710093-8714038	ESRRG	0	36.7242	Inf	0.000190525	0.0431401	0	34
susScr3_circ:chr13:155842598-155854800	LOC100513627	0	55.0863	Inf	4.85326e-06	0.00181472	0	51
susScr3_circ:chr18:35925585-35928978	IFRD1	0	59.4068	Inf	2.21518e-06	0.000893901	0	55
susScr3_circ:chr15:103617399-103661579	GULP1	137.021	1.08012	-6.98706	1.83924e-09	1.17128e-06	148	0
susScr3_circ:chr14:77358916-77359881	MYPN	997.108	0	#NAME?	1.75731e-20	1.07501e-16	1077	0
susScr3_circ:chr2:69998260-69999081	DNM2	0	51.8459	Inf	8.90117e-06	0.00306884	0	48
susScr3_circ:chr13:167195512-167211925	*	0	114.493	Inf	6.82434e-10	4.63566e-07	0	106
susScr3_circ:chr1:119541595-119542601	HERC1	0	187.941	Inf	5.24373e-13	5.47997e-10	0	174
susScr3_circ:chr9:22402298-22404468	LOC100521029	0	70.208	Inf	3.48882e-07	0.000162467	0	65
susScr3_circ:chr10:28075599-28075879	IGFN1	374.031	47.5254	-2.97639	8.96021e-06	0.00306884	2	0
susScr3_circ:chr14:14118550-14121555	HMBOX1	129.615	0	#NAME?	4.22462e-10	2.96867e-07	140	0
susScr3_circ:chr2:157822105-157823042	HMGXB3	0	299.194	Inf	6.53298e-16	1.0241e-12	0	277
susScr3_circ:chr18:1457168-1463300	LOC100525669	0	913.784	Inf	4.83949e-21	4.93108e-17	0	846
susScr3_circ:chr10:28063414-28063784	IGFN1	886.01	1.08012	-9.67998	4.00823e-19	2.04204e-15	1	0
susScr3_circ:chr13:33957923-33961723	LOC100519172	0	52.926	Inf	7.25877e-06	0.00255039	0	49
susScr3_circ:chr8:120767276-120768132	SEC24B	0	318.636	Inf	2.73122e-16	4.83985e-13	0	295
susScr3_circ:chr10:28310885-28312698	LOC100623698	475.872	65.8875	-2.85249	1.49551e-05	0.0048375	2	0
susScr3_circ:chr14:112950592-112952367	TNKS2	0	44.2851	Inf	3.91321e-05	0.0110757	0	41
susScr3_circ:chr1:1175729-1187482	WDR27	0	91.8105	Inf	1.31189e-08	7.6384e-06	0	85
susScr3_circ:chr2:16545939-16546678	NR1H3	0	130.695	Inf	1.0606e-10	8.00498e-08	0	121
susScr3_circ:chr6:92090650-92102784	ANKRD12	0	38.8844	Inf	0.00011976	0.029228	0	36
susScr3_circ:chr9:78959290-78959568	ANKIB1	0	104.772	Inf	2.29481e-09	1.43891e-06	0	97
susScr3_circ:chr15:124693193-124720160	KANSL1L	352.737	0	#NAME?	3.79838e-16	6.45045e-13	381	0
susScr3_circ:chr13:90962314-90963935	XRN1	0	171.74	Inf	1.98483e-12	1.8813e-09	0	159
susScr3_circ:chr11:20075966-20082683	SUCLA2	51.8459	0	#NAME?	1.81789e-05	0.00565586	56	0
susScr3_circ:chr12:57971037-57997088	LOC100737032	11.1098	152.297	3.77698	2.31131e-06	0.000918861	0	6
susScr3_circ:chr9:30657642-30658578	AMOTL1	162.019	0	#NAME?	1.88734e-11	1.60255e-08	175	0
susScr3_circ:chr18:54940890-54960939	ADCY1	46.291	0	#NAME?	5.03359e-05	0.0136769	50	0
susScr3_circ:chr18:59551551-59561149	*	40.7361	0	#NAME?	0.000146287	0.0348667	44	0
susScr3_circ:chr1:202609214-202612325	PSMC6	5.55492	123.134	4.47032	6.86706e-07	0.000307561	0	111
susScr3_circ:chr12:20316409-20319673	EZH1	72.214	0	#NAME?	6.21454e-07	0.000281429	78	0
susScr3_circ:chr13:212947616-212948534	BRWD1	182.387	0	#NAME?	3.50803e-12	3.24947e-09	197	0
susScr3_circ:chr14:122449149-122459005	FBXW4	199.051	0	#NAME?	1.00941e-12	1.00343e-09	215	0
susScr3_circ:chr10:50688302-50702358	FAM188A	0	927.826	Inf	4.47175e-21	4.93108e-17	0	859
susScr3_circ:chr1:278917340-278922241	RAD23B	0	238.707	Inf	1.59565e-14	1.97072e-11	0	221
susScr3_circ:chr4:15905221-15931051	TMEM65	0	97.2111	Inf	6.22796e-09	3.78855e-06	0	90
susScr3_circ:chr6:869934-870291	*	0	418.008	Inf	7.52594e-18	1.91709e-14	0	387
susScr3_circ:chr18:52592734-52607709	MPP6	97.2111	0	#NAME?	1.84605e-08	1.03068e-05	105	0
susScr3_circ:chr6:870287-870714	LOC102158401	0	95.0509	Inf	8.36251e-09	4.93958e-06	0	88
susScr3_circ:chr6:869802-870717	LOC102158401	0	769.048	Inf	1.44316e-20	1.07501e-16	0	712
susScr3_circ:chr6:869787-870148	*	0	396.405	Inf	1.47877e-17	3.5453e-14	0	367
susScr3_circ:chr15:53111670-53113201	SNX25	0	47.5254	Inf	2.05053e-05	0.00623682	0	44
susScr3_circ:chr10:28312593-28313590	LOC100623698	380.512	60.4869	-2.65325	5.38984e-05	0.0145479	1	0
susScr3_circ:chr6:79440885-79441933	TAF12	63.8816	0	#NAME?	2.32212e-06	0.000918861	69	0
susScr3_circ:chr3:10658314-10658786	WBSCR22	75.9172	0	#NAME?	3.54775e-07	0.000162467	82	0
susScr3_circ:chr6:870157-870675	LOC102158401	0	112.333	Inf	8.87671e-10	5.93095e-07	0	104
susScr3_circ:chr3:55619049-55623255	CNOT11	42.5877	0	#NAME?	0.000101934	0.0250272	46	0
susScr3_circ:chr17:13778285-13778664	PSD3	0	153.378	Inf	1.04666e-11	9.27368e-09	0	142
susScr3_circ:chr10:28305084-28305318	LOC100623698	212.939	30.2435	-2.81574	6.10474e-05	0.0161565	4	0
susScr3_circ:chr8:42394633-42398815	LNX1	0	49.6857	Inf	1.34591e-05	0.00438841	0	46
susScr3_circ:chr2:30491227-30491902	QSER1	198.126	0	#NAME?	1.07867e-12	1.04674e-09	214	0
susScr3_circ:chr10:28075280-28075610	IGFN1	390.696	58.3267	-2.74382	3.17968e-05	0.00925674	2	0
susScr3_circ:chr16:23698631-23708050	NUP155	0	48.6056	Inf	1.65968e-05	0.00524368	0	45
susScr3_circ:chr13:117567899-117581247	PHC3	0	64.8074	Inf	8.62359e-07	0.000373906	0	60
susScr3_circ:chr14:50016860-50034842	MTMR3	201.829	0	#NAME?	8.28784e-13	8.44469e-10	218	0
susScr3_circ:chr10:28309738-28310796	LOC100623698	536.05	99.3714	-2.43147	0.000162895	0.0377223	2	0
susScr3_circ:chr14:95245306-95251819	BMPR1A	0	341.319	Inf	1.06839e-16	1.97928e-13	0	316
susScr3_circ:chr4:87209598-87214970	PRKDC	0	37.8043	Inf	0.000150772	0.0351145	0	35
susScr3_circ:chr12:315609-323714	TBCD	47.2168	0	#NAME?	4.23396e-05	0.011739	51	0
susScr3_circ:chr5:988588-995484	ATXN10	53.6976	0	#NAME?	1.30772e-05	0.0042983	58	0
susScr3_circ:chr10:28306173-28306394	LOC100623698	237.936	24.8428	-3.25967	5.08321e-06	0.00188342	4	0
susScr3_circ:chr16:70415680-70477060	EBF1	2.77746	61.567	4.47032	8.92153e-05	0.0223076	0	54
susScr3_circ:chr10:76033749-76044859	LOC100624860	293.485	0	#NAME?	4.48991e-15	6.31018e-12	317	0
susScr3_circ:chr12:41290962-41293183	*	61.1041	0	#NAME?	3.67097e-06	0.00138535	66	0
susScr3_circ:chr11:56140966-56142114	RBM26	0	62.6472	Inf	1.25172e-06	0.00052594	0	58
susScr3_circ:chr3:5184976-5192337	PMS2	71.2881	0	#NAME?	7.16635e-07	0.000314417	77	0
susScr3_circ:chr14:122429376-122459005	FBXW4	0	72.3683	Inf	2.45418e-07	0.000120512	0	67
susScr3_circ:chr6:871815-872195	LOC102158401	85.1754	0	#NAME?	9.30339e-08	4.79973e-05	92	0
susScr3_circ:chr15:103617399-103628100	GULP1	0	108.012	Inf	1.51869e-09	9.82496e-07	0	100
susScr3_circ:chr12:37378287-37380695	TUBD1	0	54.0062	Inf	5.9301e-06	0.00215798	0	50
susScr3_circ:chr4:67884090-67893087	LOC100516133	0	927.826	Inf	4.47175e-21	4.93108e-17	0	859
susScr3_circ:chr2:17755529-17771066	LOC100516848	4997.58	0	#NAME?	2.93468e-17	5.98045e-14	5398	0
susScr3_circ:chr6:870288-870675	LOC102158401	0	37.8043	Inf	0.000150772	0.0351145	0	35
susScr3_circ:chr9:140014053-140018950	C9H1orf27	45.3652	0	#NAME?	5.99229e-05	0.0159626	49	0
susScr3_circ:chr6:73446116-73536700	LOC100516676	456.429	4.32049	-6.72305	2.33568e-14	2.64431e-11	488	0
susScr3_circ:chr2:75368625-75369673	ATCAY	48.1426	0	#NAME?	3.56607e-05	0.010308	52	0
susScr3_circ:chr6:870102-870435	*	0	41.0447	Inf	7.60692e-05	0.0194991	0	38
susScr3_circ:chr15:53008500-53105614	SNX25	3.70328	73.4484	4.30986	3.88446e-05	0.0110713	0	23
susScr3_circ:chr9:40614116-40617293	ACAT1	105.543	0	#NAME?	6.48331e-09	3.88588e-06	114	0
susScr3_circ:chr6:869785-870445	*	47.2168	0	#NAME?	4.23396e-05	0.011739	51	0
susScr3_circ:chr5:32061014-32066245	XPOT	51.8459	0	#NAME?	1.81789e-05	0.00565586	56	0
susScr3_circ:chr8:73445358-73453156	ANKRD17	55.5492	0	#NAME?	9.45285e-06	0.00321058	60	0
susScr3_circ:chr8:33351020-33354941	APBB2	0	76.6888	Inf	1.23483e-07	6.21332e-05	0	71
susScr3_circ:chr10:28061288-28063972	IGFN1	1279.48	5.40062	-7.88822	3.36445e-17	6.52976e-14	8	0
susScr3_circ:chr10:50698422-50702358	FAM188A	0	43.2049	Inf	4.87359e-05	0.0133311	0	40
susScr3_circ:chr5:92502063-92522814	NR2C1	99.0628	0	#NAME?	1.45583e-08	8.24098e-06	107	0
susScr3_circ:chr6:868808-870719	LOC102158401	132.392	10.8012	-3.61555	1.20484e-05	0.00402506	143	10
susScr3_circ:chr2:43264513-43271133	CSRP3	15.7389	253.829	4.01145	6.75468e-08	3.57533e-05	0	2
susScr3_circ:chr6:870107-876397	LOC102158401	9.2582	1602.9	7.43574	3.97714e-16	6.48386e-13	0	2
susScr3_circ:chr6:866534-870148	LOC102158256	54.6234	0	#NAME?	1.11117e-05	0.00374281	1	0
susScr3_circ:chr6:869978-870254	*	442.542	0	#NAME?	2.1457e-17	4.60275e-14	478	0
susScr3_circ:chr2:65578759-65579018	*	40.7361	266.79	2.71133	5.7492e-05	0.0154158	0	4
susScr3_circ:chr1:105833834-105854597	PSTPIP2	128.689	0	#NAME?	4.65844e-10	3.21804e-07	139	0
susScr3_circ:chr6:83154360-83158468	S100PBP	0	86.4099	Inf	2.84274e-08	1.54482e-05	0	80
susScr3_circ:chr9:14197445-14201808	NARS2	99.0628	0	#NAME?	1.45583e-08	8.24098e-06	107	0
susScr3_circ:chr6:869789-870302	*	158.315	0	#NAME?	2.61683e-11	2.17661e-08	171	0
susScr3_circ:chr14:68195867-68212247	CCDC6	0	127.455	Inf	1.51632e-10	1.12365e-07	0	118
susScr3_circ:chr6:870167-870698	LOC102158401	0	97.2111	Inf	6.22796e-09	3.78855e-06	0	90
susScr3_circ:chr4:43558505-43574090	MTERFD1	149.057	0	#NAME?	6.10693e-11	4.978e-08	161	0
susScr3_circ:chr15:124719044-124720160	KANSL1L	0	478.495	Inf	1.45241e-18	4.93298e-15	0	443
susScr3_circ:chr10:17590913-17599176	LOC102166191	57.4008	0	#NAME?	6.86524e-06	0.00245444	62	0
susScr3_circ:chr13:211131404-211156675	DYRK1A	40.7361	0	#NAME?	0.000146287	0.0348667	44	0
susScr3_circ:chr6:869802-870256	*	41.6619	0	#NAME?	0.000122025	0.0294282	45	0
susScr3_circ:chr9:13245753-13249740	CLNS1A	0	46.4453	Inf	2.53838e-05	0.00750062	0	43
susScr3_circ:chr10:35240929-35263088	GKAP1	87.0271	0	#NAME?	7.19141e-08	3.75769e-05	94	0
susScr3_circ:chr1:116736713-116748998	TXNL1	174.054	0	#NAME?	6.82686e-12	6.18317e-09	188	0
susScr3_circ:chr14:136879801-136888438	ATRNL1	43.5135	0	#NAME?	8.52716e-05	0.0214532	47	0
susScr3_circ:chr6:871508-871868	LOC102158401	47.2168	0	#NAME?	4.23396e-05	0.011739	51	0
susScr3_circ:chr18:1445459-1463300	LOC100525669	41.6619	0	#NAME?	0.000122025	0.0294282	45	0
susScr3_circ:chr7:12247873-12271827	DTNBP1	62.0299	0	#NAME?	3.14785e-06	0.00119904	67	0
susScr3_circ:chr13:84626456-84659957	PCCB	0	247.348	Inf	9.60086e-15	1.30434e-11	0	229
susScr3_circ:chr6:870255-870677	LOC102158401	38.8844	0	#NAME?	0.000211169	0.0475504	42	0
susScr3_circ:chr14:63330103-63342789	LOC102160827	0	71.2881	Inf	2.92405e-07	0.000140206	0	66
susScr3_circ:chr13:90382800-90387683	RNF7	0	52.926	Inf	7.25877e-06	0.00255039	0	49
susScr3_circ:chr18:18854092-18907021	*	0	243.028	Inf	1.23449e-14	1.57232e-11	0	225
susScr3_circ:chr10:28313481-28314229	LOC100623698	894.342	159.858	-2.48403	0.000174196	0.0401114	2	0
susScr3_circ:chr6:870459-870719	LOC102158401	0	37.8043	Inf	0.000150772	0.0351145	0	35
susScr3_circ:chr14:948863-949498	LOC100739159	0	47.5254	Inf	2.05053e-05	0.00623682	0	44
susScr3_circ:chr15:61425963-61427279	WRN	0	54.0062	Inf	5.9301e-06	0.00215798	0	50
susScr3_circ:chr10:58907402-58912493	LOC100521511	0	1519.73	Inf	1.92663e-21	4.93108e-17	0	1407
susScr3_circ:chr6:870319-870717	LOC102158401	0	41.0447	Inf	7.60692e-05	0.0194991	0	38
susScr3_circ:chr2:66329203-66337774	NFIX	0	43.2049	Inf	4.87359e-05	0.0133311	0	40
susScr3_circ:chrX:73952719-73958009	BRWD3	69.4365	0	#NAME?	9.55732e-07	0.000405758	75	0
susScr3_circ:chr6:42900791-42902755	RYR1	571.231	0	#NAME?	1.20772e-18	4.47484e-15	617	0
susScr3_circ:chr1:264890623-264891198	RNF38	0	39.9646	Inf	9.53422e-05	0.0236943	0	37
susScr3_circ:chr8:3341344-3348457	TBC1D14	0	237.627	Inf	1.7029e-14	2.04132e-11	0	220
susScr3_circ:chr15:61682878-61685041	PPP2CB	524.014	0	#NAME?	3.03345e-18	9.17784e-15	566	0
susScr3_circ:chr7:1677948-1692941	MYLK4	6.48074	85.3298	3.71882	6.96335e-05	0.0181927	0	7
susScr3_circ:chr10:16256296-16292113	LOC100525245	163.87	0	#NAME?	1.60687e-11	1.39343e-08	177	0
susScr3_circ:chr8:146890664-146915909	ANTXR2	0	48.6056	Inf	1.65968e-05	0.00524368	0	45
susScr3_circ:chr6:871815-872274	LOC102158401	93.5078	0	#NAME?	2.99461e-08	1.60594e-05	101	0
susScr3_circ:chr1:106025647-106026431	C1H18orf25	0	61.567	Inf	1.51161e-06	0.000628661	0	57
susScr3_circ:chr6:871815-872276	LOC102158401	75.9172	0	#NAME?	3.54775e-07	0.000162467	82	0
susScr3_circ:chr6:157477813-157483776	NFYC	76.8431	0	#NAME?	3.09097e-07	0.000146487	83	0
susScr3_circ:chr1:280698630-280701515	TMEM245	0	87.49	Inf	2.4297e-08	1.33821e-05	0	81
susScr3_circ:chr14:13680246-13689021	EXTL3	43.5135	0	#NAME?	8.52716e-05	0.0214532	47	0
susScr3_circ:chr11:26425715-26430206	SUGT1	50.9201	0	#NAME?	2.14733e-05	0.00648286	55	0
susScr3_circ:chr17:43359995-43369268	NCOA6	53.6976	0	#NAME?	1.30772e-05	0.0042983	58	0
susScr3_circ:chr1:283916128-283917980	HSDL2	0	37.8043	Inf	0.000150772	0.0351145	0	35
susScr3_circ:chr9:8944659-8950452	RAB6A	0	58.3267	Inf	2.68821e-06	0.00104346	0	54
susScr3_circ:chr6:870157-870664	LOC102158401	0	60.4869	Inf	1.8284e-06	0.000745201	0	56
susScr3_circ:chr13:33302594-33305339	*	0	76.6888	Inf	1.23483e-07	6.21332e-05	0	71
susScr3_circ:chr2:153598277-153602436	PRELID2	0	225.746	Inf	3.56918e-14	3.9316e-11	0	209
susScr3_circ:chr6:870290-870719	LOC102158401	132.392	0	#NAME?	3.16104e-10	2.26025e-07	143	0
susScr3_circ:chr6:870262-870698	LOC102158401	0	4505.19	Inf	3.37777e-18	9.17784e-15	0	4171
susScr3_circ:chr1:188150674-188179860	LOC100157683	0	41.0447	Inf	7.60692e-05	0.0194991	0	38
susScr3_circ:chr14:68425345-68426511	ANK3	134.244	0	#NAME?	2.61221e-10	1.90117e-07	145	0
susScr3_circ:chr10:28063850-28070070	IGFN1	962.853	9.72111	-6.63005	3.88061e-15	5.64865e-12	1	0
susScr3_circ:chr7:60126099-60126646	PLIN1	82.398	5.40062	-3.93141	6.49939e-05	0.01709	8	0
susScr3_circ:chr13:3107945-3113691	ANKRD28	0	45.3652	Inf	3.14852e-05	0.00923197	0	42
susScr3_circ:chr6:148118708-148135855	OSBPL9	57.4008	0	#NAME?	6.86524e-06	0.00245444	62	0
susScr3_circ:chr6:869825-870717	LOC102158401	19.4422	522.78	4.74894	1.05755e-10	8.00498e-08	21	484
susScr3_circ:chr18:42195826-42207089	HERPUD2	0	133.935	Inf	7.47071e-11	5.85546e-08	0	124
susScr3_circ:chr13:131233764-131237882	PARL	0	267.871	Inf	3.09227e-15	4.66784e-12	0	248
susScr3_circ:chr18:59484562-59551671	*	0	51.8459	Inf	8.90117e-06	0.00306884	0	48
susScr3_circ:chr7:1685158-1741441	MYLK4	6.48074	95.0509	3.87447	2.39056e-05	0.00716413	4	0
susScr3_circ:chr3:106710521-106715085	THUMPD2	119.431	0	#NAME?	1.27677e-09	8.39308e-07	129	0
susScr3_circ:chr6:871815-872182	LOC102158401	39.8103	0	#NAME?	0.000175629	0.040214	43	0
susScr3_circ:chr6:869887-870717	LOC102158401	42.5877	0	#NAME?	0.000101934	0.0250272	46	0
susScr3_circ:chr6:870003-870342	*	65.7332	0	#NAME?	1.72024e-06	0.000708202	71	0
susScr3_circ:chr7:44175065-44175911	POLH	0	47.5254	Inf	2.05053e-05	0.00623682	0	44
susScr3_circ:chr9:40658461-40663587	NPAT	0	65.8875	Inf	7.17441e-07	0.000314417	0	61
susScr3_circ:chr1:127997793-128023881	TEX9	0	446.091	Inf	3.36181e-18	9.17784e-15	0	413
susScr3_circ:chr6:870445-870719	LOC102158401	62.0299	0	#NAME?	3.14785e-06	0.00119904	67	0
susScr3_circ:chr9:79865579-79882043	CCDC132	115.728	3.24037	-5.15843	2.78106e-07	0.000134938	121	0
susScr3_circ:chr18:14695794-14696059	CNOT4	49.9943	0	#NAME?	2.53965e-05	0.00750062	54	0
